# Supplementary figures and images for: Fabrication of porous carbon spheres for high-performance electrochemical capacitors
Source: Royal Society of Chemistry journal article supplement (doi:10.1039/c3ra44305a), 2014-01-01

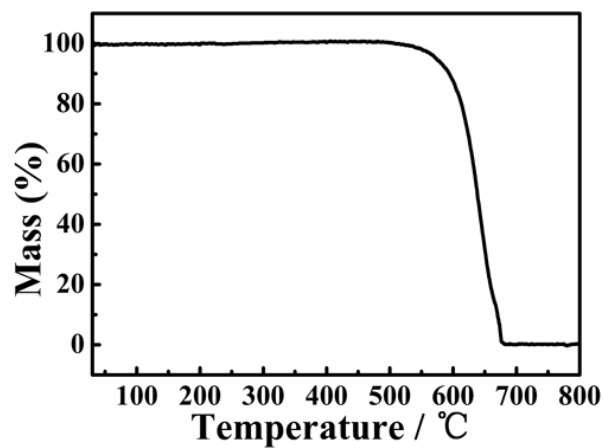

Figure S-1. TGA curve of PCS-120.

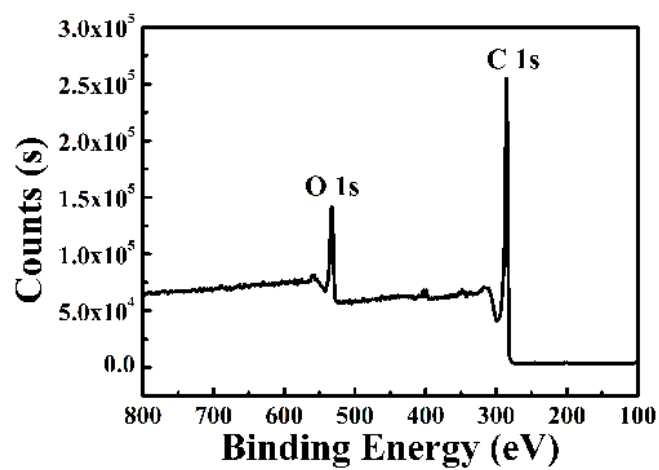

Figure S-2. XPS scan of PCS-120.

Supplement: c3ra44305a.pdf [file c3ra44305a.pdf]
